# Supplementary material for: Phenolic Compounds from Carissa spinarum Are Characterized by Their Antioxidant, Anti-Inflammatory and Hepatoprotective Activities
Source: MDPI journal article supplement (doi:10.3390/antiox10050652), 2021-04-23

## Supplementary Materials for

# Phenolic Compounds Screened and Revealed out from *Carissa spinarum* with Potent Antioxidant, Anti-inflammatory and Hepatoprotective Activities

Ye Liu<sup>1,2,3</sup>, Yongli Zhang<sup>1,2,3</sup>, Felix Wambua Muema<sup>1,2,3,4</sup>, Festus Kimutai<sup>1,2,3,4</sup>, Guilin Chen<sup>1,2,3</sup>, and Mingquan Guo<sup>1,2,3,\*</sup>

<sup>1</sup> CAS Key Laboratory of Plant Germplasm Enhancement and Specialty Agriculture, Wuhan Botanical Garden, Chinese Academy of Sciences, Wuhan 430074, China; [liuye@wbcas.cn](mailto:liuye@wbcas.cn) (Y.L.); [zhangyl@wbcas.cn](mailto:zhangyl@wbcas.cn) (Y.Z.); [fwambua83@gmail.com](mailto:fwambua83@gmail.com) (F.W.M.); [festokim81@gmail.com](mailto:festokim81@gmail.com) (F.K.); [glchen@wbcas.cn](mailto:glchen@wbcas.cn) (G.C.)

<sup>2</sup> Sino-Africa Joint Research Center, Chinese Academy of Sciences, Wuhan 430074, China

<sup>3</sup> Innovation Academy for Drug Discovery and Development, Chinese Academy of Sciences, Shanghai 201203, China

<sup>4</sup> Graduate University of Chinese Academy of Sciences, Beijing 100049, China

\* Correspondence: [guomq@wbcas.cn](mailto:guomq@wbcas.cn); Tel.: +86-027-87700850

## Content

**Figure S1.** The isolation flow chart of compounds **1–10**

**Figure S2.** (+)-HR-ESI-MS spectrum of **5**

**Figure S3.**  $^1\text{H}$  NMR (600 MHz,  $\text{CD}_3\text{OD}$ ) spectrum of **5**

**Figure S4.**  $^{13}\text{C}$  NMR (125 MHz,  $\text{CD}_3\text{OD}$ ) spectrum of **5**

**Figure S5.** DEPT 135 (125 MHz,  $\text{CD}_3\text{OD}$ ) spectrum of **5**

**Figure S6.** HSQC spectrum of **5** in  $\text{CD}_3\text{OD}$

**Figure S7.**  $^1\text{H}$ - $^1\text{H}$  COSY spectrum of **5** in  $\text{CD}_3\text{OD}$

**Figure S8.** HMBC spectrum of **5** in  $\text{CD}_3\text{OD}$

**Figure S9.** NOESY spectrum of **5** in  $\text{CD}_3\text{OD}$

**Figure S1.** The isolation flow chart of compounds **1–10**

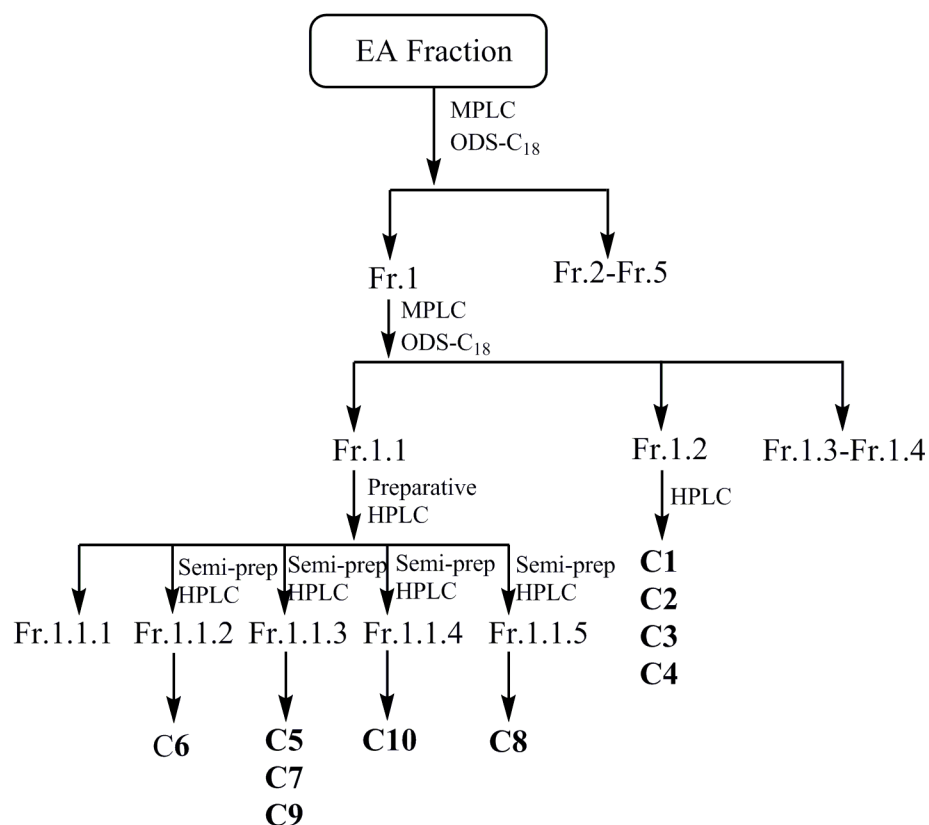

**Figure S2.** (+)-HR-ESI-MS spectrum of **5**

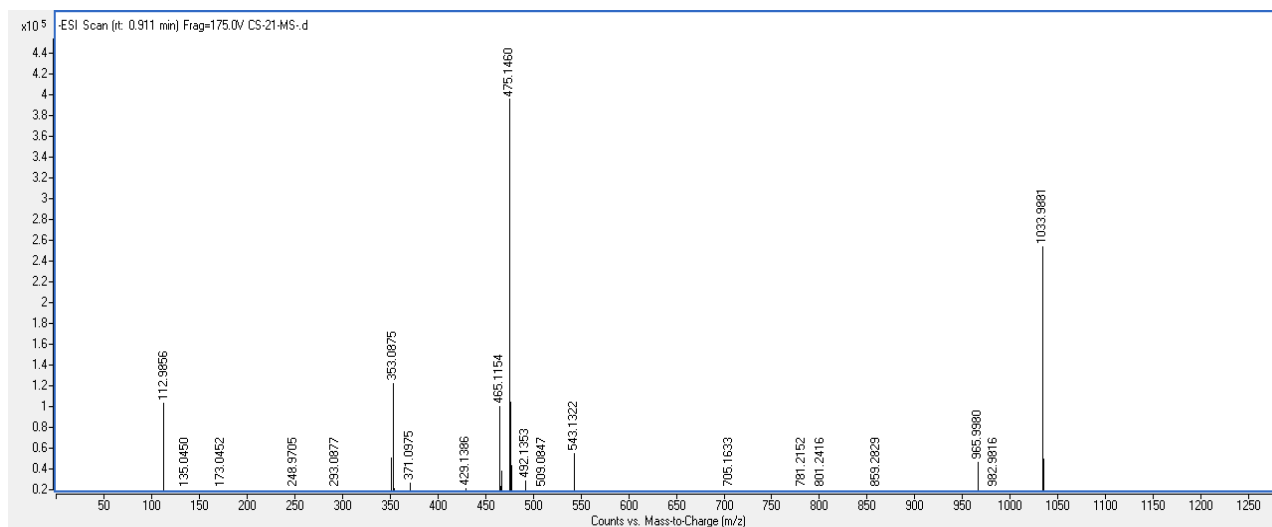

**Figure S3.**  $^1\text{H}$  NMR (600 MHz,  $\text{CD}_3\text{OD}$ ) spectrum of **5**

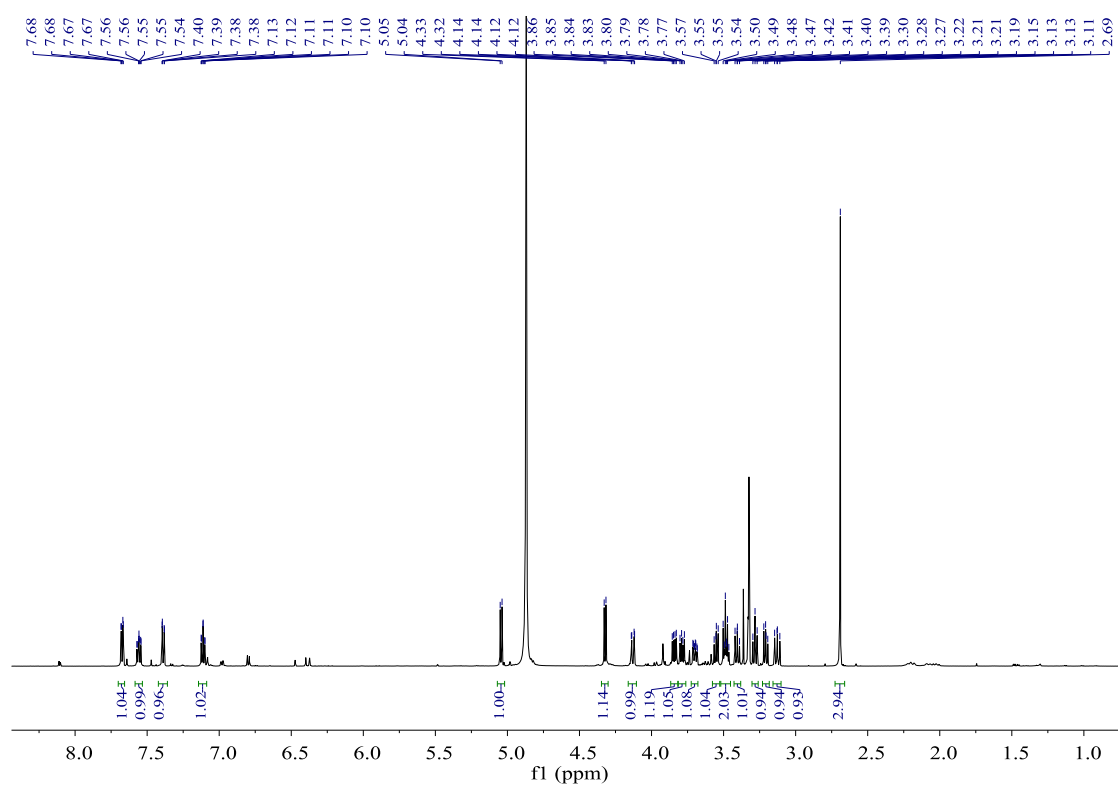

**Figure S4.**  $^{13}\text{C}$  NMR (125 MHz,  $\text{CD}_3\text{OD}$ ) spectrum of **5**

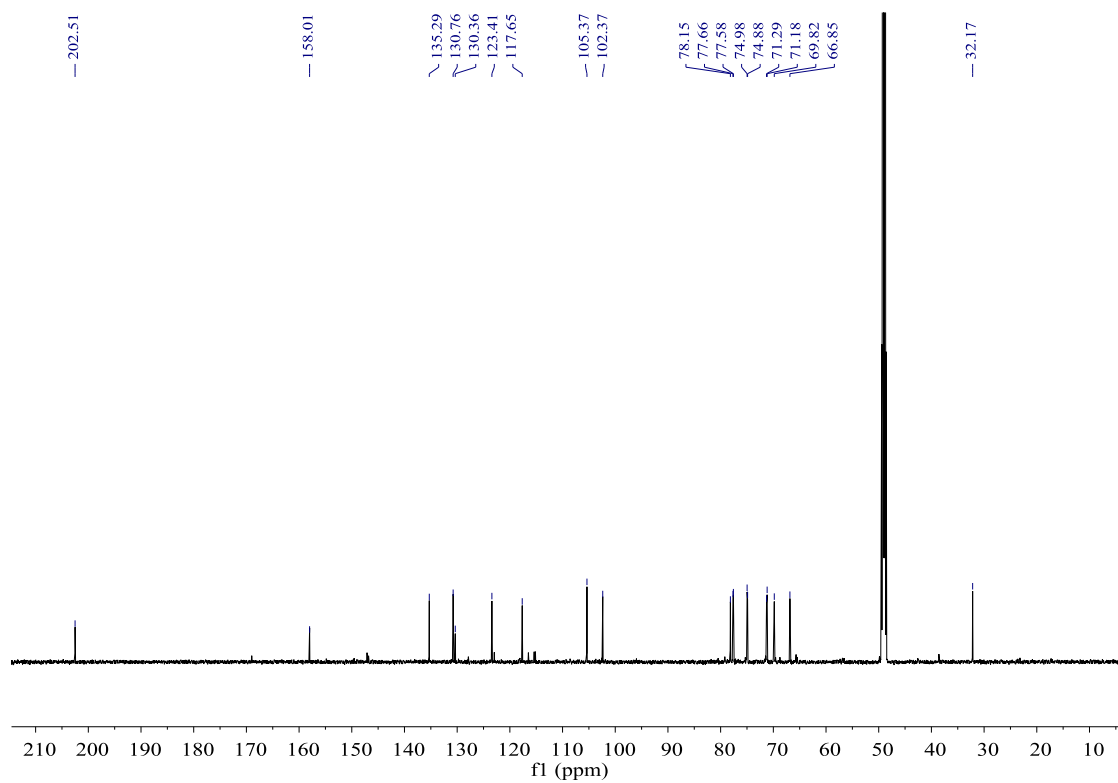

**Figure S5.** DEPT 135 (125 MHz, CD<sub>3</sub>OD) spectrum of **5**

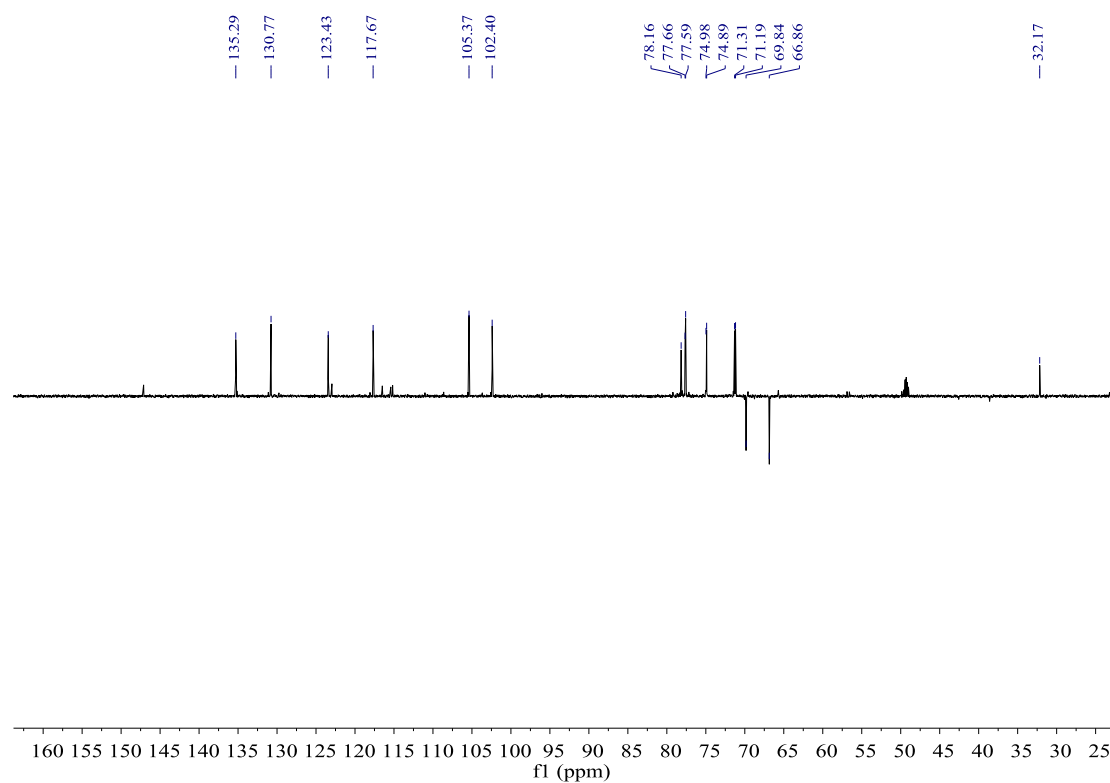

**Figure S6.** HSQC spectrum of **5** in CD<sub>3</sub>OD

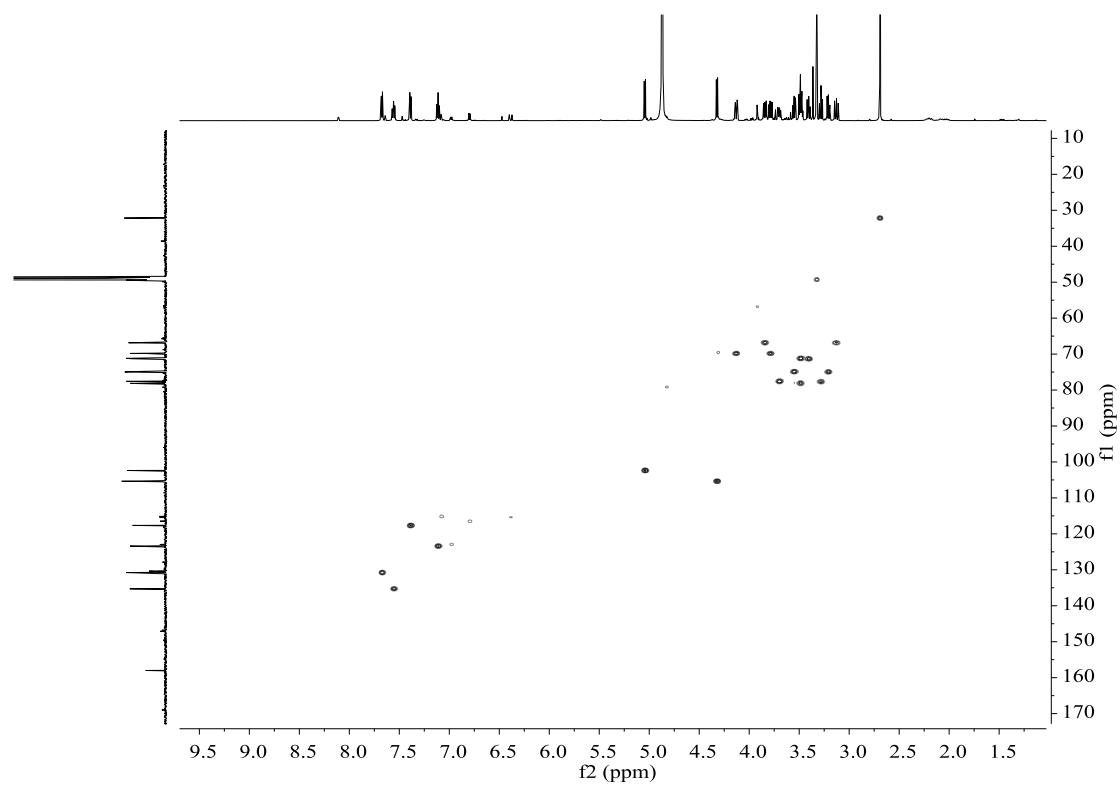

**Figure S7.**  $^1\text{H}$ - $^1\text{H}$  COSY spectrum of **5** in  $\text{CD}_3\text{OD}$

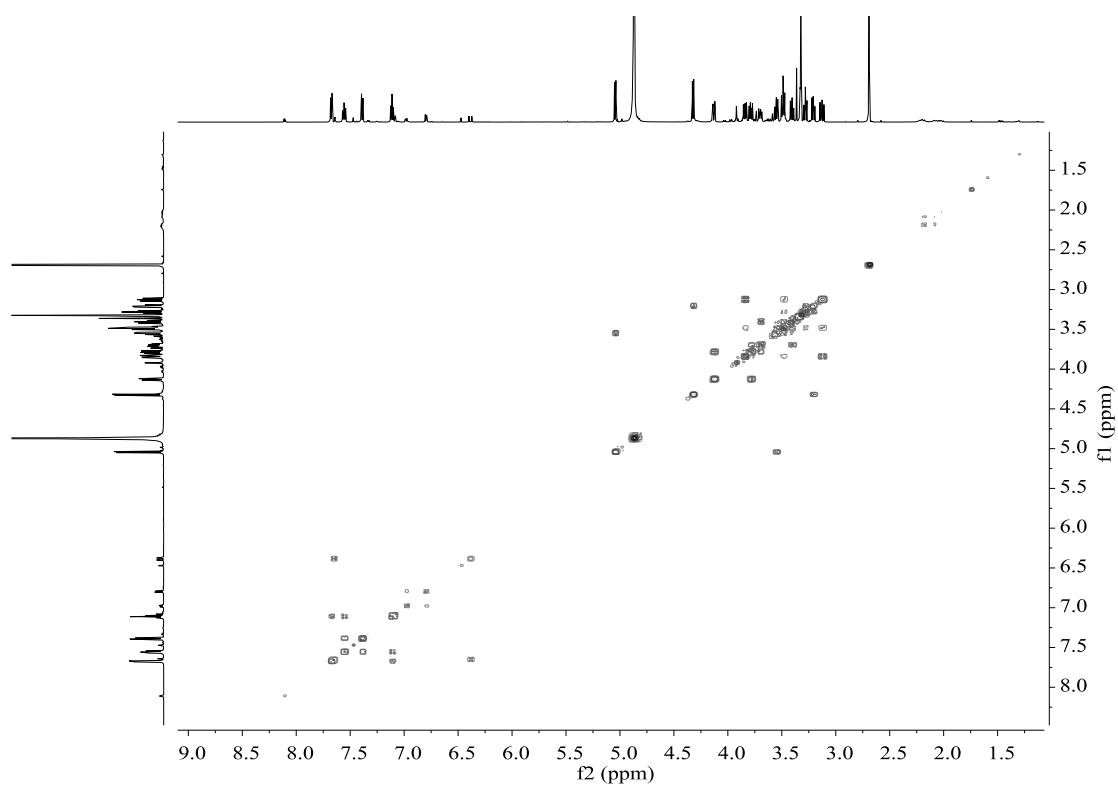

**Figure S8.** HMBC spectrum of **5** in  $\text{CD}_3\text{OD}$

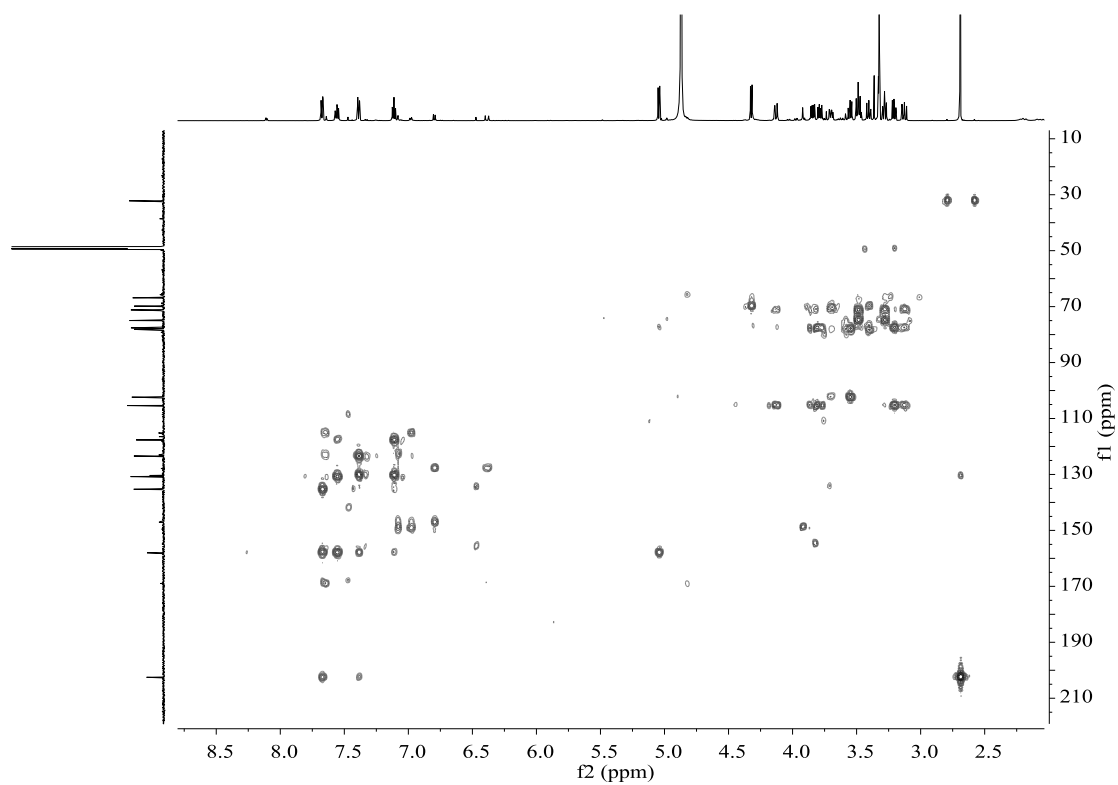

**Figure S9.** NOESY spectrum of **5** in CD<sub>3</sub>OD

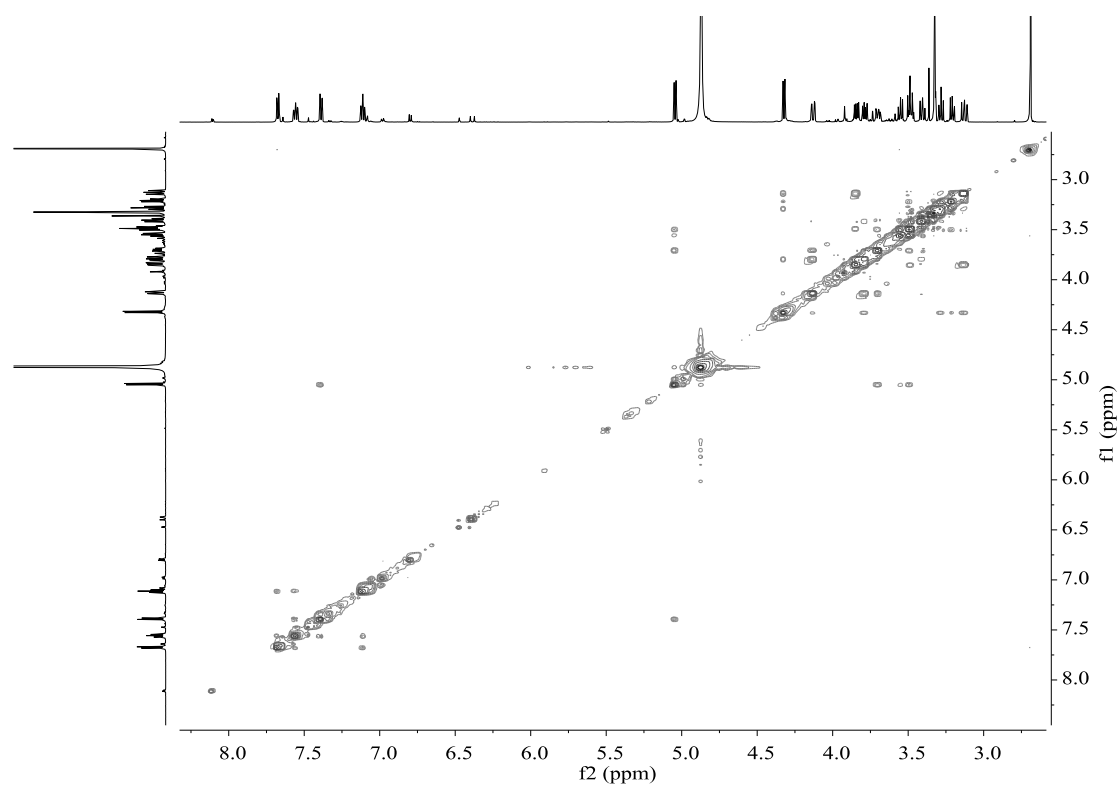

Supplement: s1 [file s1]
